# Supplementary material for: Leukocyte Production of Inflammatory Mediators Is Inhibited by the Antioxidants Phloretin, Silymarin, Hesperetin, and Resveratrol
Source: Mediators Inflamm. 2014 Feb 24;2014:938712. doi: 10.1155/2014/938712 (PMC3953573; doi:10.1155/2014/938712)
Supplement: Supplementary file 1 — Peripheral Blood Mononuclear Cells (PBMC) from 3 biological donors were activated with lipopolysaccharide from Aggregatibacter actinomycetemcomitans (Y4) and the supernatant was assayed for TNF-α, IL-1α, IL-1β, G-CSF, GM-CSF, IFN-γ, IL-6, IL-10, MCP-1, CCL5, MIP-1α, MIP-1β, IL-Ra, CXCL5, CXCL8 (IL-8), VEGF, IL-4, FGF basic, IL-2, IL-5, IL-17, and TPO after 18 hrs via cytometric bead array. [file 938712.f1.xlsx]

## Sheet: Sheet1
Treatment	CXCL5	FGFb	G-CSF	GM-CSF	IFN-γ	IL-1α	IL-1β	IL-1Ra	IL-2	IL-4	IL-5	IL-6	IL-8	IL-10	IL-17	CCL2	MIP-1α	MIP-1β	CCL5	TNF-α	TPO	VEGF
Media	13321 ± 10920	N/D	8 ± 11	8 ± 11	N/D	N/D	40 ± 45	4522 ± 706	3 ± 5	N/D	N/D	249 ± 335	OOR>	3 ± 1	N/D	929 ± 825	195 ± 166	419 ± 415	106 ± 20	30 ± 24	N/D	17 ± 19
LPS only	16572 ± 11730	N/D	4619 ± 759	1315 ± 1489	818 ± 609	2257 ± 1058	23609 ± 4252	28553 ± 1717	1 ± 2	N/D	N/D	39725 ± 6578	OOR>	833 ± 231	N/D	3583 ± 2151	62363 ± 30548	82438 ± 21363	1026 ± 171	10090 ± 4490	N/D	21 ± 34
Oleuropein	5144 ± 3689	N/D	3759 ± 1335	1284 ± 725	403 ± 324	1980 ± 707	20552 ± 3315	27352 ± 17034	N/D	N/D	N/D	48345 ± 6677	OOR>	568 ± 335	N/D	420 ± 248	80023 ± 22531	79590 ± 22242	746 ± 42	9790 ± 3149	N/D	17 ± 29
Silymarin	719 ± 473	N/D	860 ± 311	149 ± 57	N/D	1025 ± 245	18335 ± 3476	4542 ± 926	N/D	N/D	N/D	21137 ± 3506	OOR>	5 ± 3	N/D	5 ± 1	37019 ± 37263	4928 ± 20731	338 ± 24	1683 ± 224	N/D	54 ± 55
Ferulic Acid	7031 ± 4894	N/D	2835 ± 904	1762 ± 1905	1027 ± 661	2513 ± 549	26086 ± 966	27293 ± 8193	1 ± 1	N/D	N/D	45218 ± 2749	OOR>	564 ± 279	N/D	130 ± 46	81274 ± 19153	77528 ± 37263	871 ± 96	10290 ± 4864	N/D	20 ± 34
Hesperetin	21555 ± 15652	N/D	2404 ± 812	732 ± 542	24 ± 35	254 ± 230	5171 ± 5357	47713 ± 40890	N/D	N/D	N/D	33013 ± 5794	OOR>	541 ± 109	N/D	33 ± 17	77538 ± 4264	80215 ± 21915	477 ± 11	3652 ± 1592	N/D	38 ± 57
Resveratrol	495 ± 355	N/D	2413 ± 512	38 ± 4	N/D	291 ± 39	13214 ± 1325	5449 ± 526	N/D	N/D	N/D	16036 ± 3763	OOR>	3 ± 2	N/D	4 ± 1	61239 ± 32496	80002 ± 20560	445 ± 92	964 ± 205	N/D	14 ± 19
Phloretin	1110 ± 824	N/D	1555 ± 755	423 ± 241	N/D	1158 ± 297	22013 ± 1061	10021 ± 2429	N/D	N/D	N/D	28146 ± 11242	OOR>	115 ± 58	N/D	5 ± 1	81329 ± 18405	37517 ± 15076	375 ± 43	3441 ± 296	N/D	N/D
Phloretin + Resveratrol	882 ± 727	N/D	4495 ± 1339	85 ± 21	N/D	685 ± 78	14871 ± 1215	18418 ± 7083	N/D	N/D	N/D	32895 ± 9189	OOR>	65 v 48	N/D	6	80679 ± 21845	83649 ± 37263	599 ± 72	3438 ± 846	N/D	9 ± 15
Phloretin + Hesperetin	7680 ± 5223	N/D	2637 ± 673	463 ± 275	8 ± 7	587 ± 212	12290 ± 4897	28921 ± 7556	N/D	N/D	N/D	34806 ± 6344	OOR>	724 ± 276	N/D	11 ± 4	68872 ± 19274	83499 ± 22352	437 ± 37	4573 ± 832	N/D	16 ± 29
Phloretin + Silymarin	1267 ± 1039	7 ± 12	1506 ± 704	354 ± 145	N/D	992 ± 45	22612 ± 620	6741 ± 1462	N/D	N/D	N/D	26884 ± 7187	OOR>	24 ± 19	N/D	4	13619 ± 5555	6015 ± 2981	327 ± 61	1797 ± 280	N/D	48 ± 50
Phloretin + Oleuropein	2583 ± 1824	N/D	3198 ± 1005	707 ± 394	72 ± 34	1753 ± 223	23740 ± 1257	27497 ± 10363	N/D	N/D	N/D	42412 ± 7720	OOR>	594 ± 333	N/D	71 ± 41	80023 ± 20919	83708 ± 21013	581 ± 38	6263 ± 1219	N/D	11 ± 19
Phloretin + Ferulic Acid	2781 ± 2090	N/D	3026 ± 1207	678 ± 500	136 ± 35	2324 ± 46	24498 ± 2617	31280 ± 23783	N/D	N/D	N/D	39457 ± 8511	OOR>	584 ± 377	N/D	27 ± 16	82612 ± 20010	81601 ± 24681	629 ± 163	7507 ± 695	N/D	12 ± 20
Silymarin + Hesperetin	7882 ± 6596	N/D	3902 ± 1595	694 ± 474	22 ± 11	1058 ± 385	16879 ± 4505	18109 ± 10451	N/D	N/D	N/D	39887 ± 4008	OOR>	200 ± 217	N/D	5 ± 1	62183 ± 30864	55316 ± 30517	436 ± 101	3381 ± 110	N/D	81 ± 106
Silymarin + Oleuropein	7231 ± 3778	N/D	3018 ± 996	931 ± 654	4 ± 4	1870 ± 303	20074 ± 1417	10960 ± 3567	N/D	N/D	N/D	43199 ± 8105	OOR>	106 ± 94	N/D	7 ± 3	58407 ± 37400	29446 ± 30123	400 ± 22	2136 ± 467	N/D	75 ± 89
Silymarin + Resveratrol	1013 ± 494	N/D	4634 ± 1437	76 ± 23	N/D	1297 ± 159	23537 ± 1213	5787 ± 1228	N/D	N/D	N/D	38450 ± 6499	OOR>	4 ± 2	N/D	4	64826 ± 26282	78511 ± 2580	367 ± 86	2168 ± 422	N/D	35 ± 42
Mean cytokine concentration (pg/ml) & Std. Dev.
OOR> = Outside of range above
N/D = Not detected
